# Supplementary material
Source: publisher figshare collection journal article supplement (https://tandf.figshare.com/articles/dataset/_/12292550)
Supplement: Supplementary file 1 [file 1]

# An optimal parameters-based geographical detector model enhances geographic characteristics of explanatory variables for spatial heterogeneity analysis: Cases with different types of spatial data

*Supplementary Information 2: Computation process and results of example cases*

Note:

R package “GD: Geographical Detectors” version 1.7.

The codes can be run by R ( $\geq 3.4.0$ ).

Orders of codes are consistent with the orders in the article.

## 4.1 Spatial raster data of vegetation changes

```
library("GD")
data(ndvi_40)
head(ndvi_40)
```

| ##   | NDVIchange | Climatezone | Mining | Tempchange | Precipitation | GDP   | Popdensity |
|------|------------|-------------|--------|------------|---------------|-------|------------|
| ## 1 | 0.11599    | Bwk         | low    | 0.25598    | 236.54        | 12.55 | 1.44957    |
| ## 2 | 0.01783    | Bwk         | low    | 0.27341    | 213.55        | 2.69  | 0.80124    |
| ## 3 | 0.13817    | Bsk         | low    | 0.30247    | 448.88        | 20.06 | 11.49432   |
| ## 4 | 0.00439    | Bwk         | low    | 0.38302    | 212.76        | 0.00  | 0.04620    |
| ## 5 | 0.00316    | Bwk         | low    | 0.35729    | 205.01        | 0.00  | 0.07482    |
| ## 6 | 0.00838    | Bwk         | low    | 0.33750    | 200.55        | 0.00  | 0.54941    |

Optimal discretization for multiple spatial variables (Figure 5)

```
## set optional discretization methods and numbers of intervals
discmethod <- c("equal","natural","quantile","geometric","sd")
discitv <- 3:7
## optimal discretization
ndvi.test <- ndvi_40
odc1 <- optidisc(NDVIchange ~ ., data = ndvi.test[, -(2:3)], discmethod, discitv)
odc1
## plot optimal discretization processes and results
plot(odc1)
## convert continuous variables to strata variables based on discretization breaks
ndvi.test[, 4:7] <- do.call(cbind, lapply(1:4, function(x)
  data.frame(cut(ndvi.test[, x+3], unique(odc1[[x]]$itv), include.lowest = TRUE))))
```

Factor detector (Figure 6):

```
## factor detector
mvgd <- gd(NDVIchange ~ ., data = ndvi.test)
mvgd
plot(mvgd)
```

Risk detector (Figure 7):

```
## risk detector: risk means
mvrn <- riskmean(NDVIchange ~ ., data = ndvi.test)
mvrn
plot(mvrn)
## risk detector: risk matrix
mvgr <- gdrisk(NDVIchange ~ ., data = ndvi.test)
mvgr
plot(mvgr)
```

Interaction detector (Figure 8a):

```
## interaction detector
mvgi <- gdiinteract(NDVIchange ~ ., data = ndvi.test)
mvgi
plot(mvgi)
```

Ecological detector (Figure 8b):

```
## ecological detector
mvge <- gdeco(NDVIchange ~ ., data = ndvi.test)
mvge
plot(mvge)
```

Results of the optimal discretization and geographical detectors by the one-step function “gdm” for exploring factors of vegetation changes.

```
data("ndvi_40")
## set optional parameters of optimal discretization
discmethod <- c("equal", "natural", "quantile", "geometric", "sd")
discitv <- 3:7
## "gdm" function (~ 10.7 s)
ndvigdm <- gdm(NDVIchange ~ .,
               continuous_variable = c("Tempchange", "Precipitation", "GDP", "Popdensity"),
               data = ndvi_40,
               discmethod = discmethod, discitv = discitv)
ndvigdm

## Explanatory variables include 4 continuous variables.
##
## optimal discretization result of Tempchange
## method          : sd
## number of intervals: 7
## intervals:
## -0.39277 0.3106004 0.6614902 1.01238 1.36327 1.71416 2.065049 3.22051
## numbers of data within intervals:
## 93 102 82 151 99 100 86
##
## optimal discretization result of Precipitation
## method          : equal
## number of intervals: 7
## intervals:
## 42.51 132.5014 222.4929 312.4843 402.4757 492.4671 582.4586 672.45
## numbers of data within intervals:
## 108 107 81 137 136 56 88
##
```

```

## optimal discretization result of GDP
## method          : natural
## number of intervals: 7
## intervals:
## 0 9.9235 33.406 100.6513 289.6999 887.9468 4598.732 16589.09
## numbers of data within intervals:
## 325 84 79 90 84 46 5
##
## optimal discretization result of Popdensity
## method          : quantile
## number of intervals: 7
## intervals:
## 0 0.2301671 0.9002686 2.021381 5.253373 14.80794 40.57514 970.8682
## numbers of data within intervals:
## 102 102 102 101 102 102 102
##
## Geographical detectors results:
##
## Factor detector:
##      variable      qv      sig
## 1  Climatezone 0.82183348 7.176240e-10
## 2      Mining 0.14111542 6.608981e-10
## 3  Tempchange 0.32655370 3.094152e-10
## 4 Precipitation 0.86935048 2.518923e-10
## 5      GDP 0.09514837 2.347511e-09
## 6  Popdensity 0.19618770 2.146283e-10
##
## Risk detector:
## Climatezone
##   itv   meanrisk
## 1 Bsk 0.143572961
## 2 Bwk 0.004536505
## 3 Dwa 0.321735000
## 4 Dwb 0.343155655
## 5 Dwc 0.444868361
##
## Mining
##      itv   meanrisk
## 1 very low 0.21008297
## 2      low 0.03294513
## 3   medium 0.30733460
## 4      high 0.26695286
## 5 very high 0.19176875
##
## Tempchange
##      itv   meanrisk
## 1 [-0.393,0.311] 0.03237419
## 2 (0.311,0.661] 0.07312216
## 3 (0.661,1.01] 0.22091646
## 4 (1.01,1.36] 0.32457258
## 5 (1.36,1.71] 0.29258313
## 6 (1.71,2.07] 0.23839880
## 7 (2.07,3.22] 0.17535547
##

```

```

## Precipitation
##      itv      meanrisk
## 1 [42.5,133] -0.01608009
## 2  (133,222]  0.02460271
## 3  (222,312]  0.07515988
## 4  (312,402]  0.22508642
## 5  (402,492]  0.31663221
## 6  (492,582]  0.45128393
## 7  (582,672]  0.44689250
##
## GDP
##      itv      meanrisk
## 1      [0,9.92] 0.1460310
## 2    (9.92,33.4] 0.2295733
## 3    (33.4,101]  0.2217597
## 4    (101,290]  0.2818238
## 5    (290,888]  0.2605960
## 6   (888,4.6e+03] 0.2748348
## 7 (4.6e+03,1.66e+04] 0.2642400
##
## Popdensity
##      itv      meanrisk
## 1    [0,0.23] 0.04825588
## 2  (0.23,0.9] 0.13872392
## 3  (0.9,2.02] 0.17562520
## 4 (2.02,5.25] 0.25928089
## 5 (5.25,14.8] 0.27412971
## 6 (14.8,40.6] 0.25845363
## 7 (40.6,971] 0.27435755
##
## Climatezone
## interval Bsk Bwk Dwa Dwb Dwc
## 1      Bsk <NA> <NA> <NA> <NA> <NA>
## 2      Bwk   Y <NA> <NA> <NA> <NA>
## 3      Dwa   Y   Y <NA> <NA> <NA>
## 4      Dwb   Y   Y   N <NA> <NA>
## 5      Dwc   Y   Y   Y   Y <NA>
##
## Mining
## interval very low low medium high very high
## 1 very low      <NA> <NA> <NA> <NA> <NA>
## 2      low      Y <NA> <NA> <NA> <NA>
## 3      medium    Y   Y <NA> <NA> <NA>
## 4      high      Y   Y   N <NA> <NA>
## 5 very high      N   Y   Y   Y <NA>
##
## Tempchange
## interval [-0.393,0.311] (0.311,0.661] (0.661,1.01] (1.01,1.36]
## 1 [-0.393,0.311] <NA> <NA> <NA> <NA>
## 2  (0.311,0.661]   Y <NA> <NA> <NA>
## 3  (0.661,1.01]   Y   Y <NA> <NA>
## 4  (1.01,1.36]   Y   Y   Y <NA>
## 5  (1.36,1.71]   Y   Y   Y   N
## 6  (1.71,2.07]   Y   Y   N   Y

```

```

## 7      (2.07,3.22]          Y          Y          N          Y
##  (1.36,1.71] (1.71,2.07] (2.07,3.22]
## 1      <NA>      <NA>      <NA>
## 2      <NA>      <NA>      <NA>
## 3      <NA>      <NA>      <NA>
## 4      <NA>      <NA>      <NA>
## 5      <NA>      <NA>      <NA>
## 6      Y        <NA>      <NA>
## 7      Y        Y        <NA>
##
## Precipitation
##      interval [42.5,133] (133,222] (222,312] (312,402] (402,492] (492,582]
## 1 [42.5,133]      <NA>      <NA>      <NA>      <NA>      <NA>      <NA>
## 2 (133,222]      Y        <NA>      <NA>      <NA>      <NA>      <NA>
## 3 (222,312]      Y        Y        <NA>      <NA>      <NA>      <NA>
## 4 (312,402]      Y        Y        Y        <NA>      <NA>      <NA>
## 5 (402,492]      Y        Y        Y        Y        <NA>      <NA>
## 6 (492,582]      Y        Y        Y        Y        Y        <NA>
## 7 (582,672]      Y        Y        Y        Y        Y        N
##  (582,672]
## 1      <NA>
## 2      <NA>
## 3      <NA>
## 4      <NA>
## 5      <NA>
## 6      <NA>
## 7      <NA>
##
## GDP
##      interval [0,9.92] (9.92,33.4] (33.4,101] (101,290] (290,888]
## 1 [0,9.92]      <NA>      <NA>      <NA>      <NA>      <NA>
## 2 (9.92,33.4]      Y        <NA>      <NA>      <NA>      <NA>
## 3 (33.4,101]      Y        N        <NA>      <NA>      <NA>
## 4 (101,290]      Y        Y        Y        <NA>      <NA>
## 5 (290,888]      Y        N        N        N        <NA>
## 6 (888,4.6e+03]      Y        N        Y        N        N
## 7 (4.6e+03,1.66e+04]      Y        N        N        N        N
##  (888,4.6e+03] (4.6e+03,1.66e+04]
## 1      <NA>      <NA>
## 2      <NA>      <NA>
## 3      <NA>      <NA>
## 4      <NA>      <NA>
## 5      <NA>      <NA>
## 6      <NA>      <NA>
## 7      N        <NA>
##
## Popdensity
##      interval [0,0.23] (0.23,0.9] (0.9,2.02] (2.02,5.25] (5.25,14.8]
## 1 [0,0.23]      <NA>      <NA>      <NA>      <NA>      <NA>
## 2 (0.23,0.9]      Y        <NA>      <NA>      <NA>      <NA>
## 3 (0.9,2.02]      Y        N        <NA>      <NA>      <NA>
## 4 (2.02,5.25]      Y        Y        Y        <NA>      <NA>
## 5 (5.25,14.8]      Y        Y        Y        N        <NA>
## 6 (14.8,40.6]      Y        Y        Y        N        N

```

```
## 7 (40.6,971] Y Y Y N N
## (14.8,40.6] (40.6,971]
## 1 <NA> <NA>
## 2 <NA> <NA>
## 3 <NA> <NA>
## 4 <NA> <NA>
## 5 <NA> <NA>
## 6 <NA> <NA>
## 7 N <NA>
##
## Interaction detector:
## variable Climatezone Mining Tempchange Precipitation GDP Popdensity
## 1 Climatezone NA NA NA NA NA NA
## 2 Mining 0.8345 NA NA NA NA NA
## 3 Tempchange 0.8538 0.4223 NA NA NA NA
## 4 Precipitation 0.9016 0.8861 0.9158 NA NA NA
## 5 GDP 0.8571 0.2438 0.3886 0.8959 NA NA
## 6 Popdensity 0.8599 0.3588 0.4352 0.9035 0.2166 NA
##
## Ecological detector:
## variable Climatezone Mining Tempchange Precipitation GDP Popdensity
## 1 Climatezone <NA> <NA> <NA> <NA> <NA> <NA>
## 2 Mining N <NA> <NA> <NA> <NA> <NA>
## 3 Tempchange N Y <NA> <NA> <NA> <NA>
## 4 Precipitation Y Y Y <NA> <NA> <NA>
## 5 GDP N N N N <NA> <NA>
## 6 Popdensity N N N N N <NA>
```

```
plot(ndvigdm)
```

Codes and data of the computation processes of the t-test for risk detector, interactions explored by the interaction detector and the F-test for ecological detector.

```
## t-test of risk detector for the variable Climatezone
ndvigdm$Risk.detector$Climatezone
```

```
## itv1 itv2 t df sig risk
## 1 Bsk Bwk 17.730358 315.88563 2.637662e-49 Y
## 2 Bsk Dwa -11.809163 52.13343 2.360201e-16 Y
## 3 Bsk Dwb -19.658136 327.45054 2.276521e-57 Y
## 4 Bsk Dwc -37.998231 304.88974 1.143504e-117 Y
## 5 Bwk Dwa -22.770854 38.27911 7.381701e-24 Y
## 6 Bwk Dwb -40.614567 215.91365 4.556501e-103 Y
## 7 Bwk Dwc -81.337846 296.50585 8.422103e-205 Y
## 8 Dwa Dwb -1.395461 55.29265 1.684563e-01 N
## 9 Dwa Dwc -8.808167 38.78614 8.589747e-11 Y
## 10 Dwb Dwc -12.080308 215.01449 5.524023e-26 Y
```

```
## t-test of risk detector for the variable Tempchange
ndvigdm$Risk.detector$Tempchange
```

```
## itv1 itv2 t df sig risk
## 1 [-0.393,0.311] (0.311,0.661] -2.1784882 192.2786 3.058620e-02 Y
## 2 [-0.393,0.311] (0.661,1.01] -8.1978707 141.2153 1.345932e-13 Y
## 3 [-0.393,0.311] (1.01,1.36] -16.0313363 234.0217 1.570643e-39 Y
## 4 [-0.393,0.311] (1.36,1.71] -12.8583388 182.2434 2.393170e-27 Y
```

```
## 5 [-0.393,0.311] (1.71,2.07] -10.9120573 189.5401 7.974504e-22 Y
## 6 [-0.393,0.311] (2.07,3.22] -7.4129666 170.1484 5.545589e-12 Y
## 7 (0.311,0.661] (0.661,1.01] -6.2085679 153.7650 4.757633e-09 Y
## 8 (0.311,0.661] (1.01,1.36] -13.0734367 236.4896 9.325721e-30 Y
## 9 (0.311,0.661] (1.36,1.71] -10.3773420 194.7078 2.309357e-20 Y
## 10 (0.311,0.661] (1.71,2.07] -8.3244706 199.8569 1.320714e-14 Y
## 11 (0.311,0.661] (2.07,3.22] -5.0504897 182.3930 1.063394e-06 Y
## 12 (0.661,1.01] (1.01,1.36] -4.4238549 156.7164 1.806223e-05 Y
## 13 (0.661,1.01] (1.36,1.71] -2.8636285 165.3820 4.731052e-03 Y
## 14 (0.661,1.01] (1.71,2.07] -0.7301574 154.8633 4.663970e-01 N
## 15 (0.661,1.01] (2.07,3.22] 1.8775727 153.0666 6.234221e-02 N
## 16 (1.01,1.36] (1.36,1.71] 1.5434067 214.0154 1.242095e-01 N
## 17 (1.01,1.36] (1.71,2.07] 4.4408817 231.4842 1.387933e-05 Y
## 18 (1.01,1.36] (2.07,3.22] 7.5356809 203.4925 1.565776e-12 Y
## 19 (1.36,1.71] (1.71,2.07] 2.5434236 194.1126 1.175653e-02 Y
## 20 (1.36,1.71] (2.07,3.22] 5.4107475 182.9856 1.947797e-07 Y
## 21 (1.71,2.07] (2.07,3.22] 3.0896365 181.6485 2.319198e-03 Y
```

```
## interactions explored by the interaction detector
ndvigdm$Interaction.detector$Interaction
```

```
##          var1          var2          qv1          qv2          qv12
## 1 Climatezone Mining 0.82183348 0.14111542 0.8344738
## 2 Climatezone Tempchange 0.82183348 0.32655370 0.8537915
## 3 Climatezone Precipitation 0.82183348 0.86935048 0.9015820
## 4 Climatezone GDP 0.82183348 0.09514837 0.8571228
## 5 Climatezone Popdensity 0.82183348 0.19618770 0.8599232
## 6 Mining Tempchange 0.14111542 0.32655370 0.4223200
## 7 Mining Precipitation 0.14111542 0.86935048 0.8861185
## 8 Mining GDP 0.14111542 0.09514837 0.2438202
## 9 Mining Popdensity 0.14111542 0.19618770 0.3587628
## 10 Tempchange Precipitation 0.32655370 0.86935048 0.9158048
## 11 Tempchange GDP 0.32655370 0.09514837 0.3885994
## 12 Tempchange Popdensity 0.32655370 0.19618770 0.4351518
## 13 Precipitation GDP 0.86935048 0.09514837 0.8958678
## 14 Precipitation Popdensity 0.86935048 0.19618770 0.9035324
## 15 GDP Popdensity 0.09514837 0.19618770 0.2165923
##          interaction
## 1 Enhance, bi-
## 2 Enhance, bi-
## 3 Enhance, bi-
## 4 Enhance, bi-
## 5 Enhance, bi-
## 6 Enhance, bi-
## 7 Enhance, bi-
## 8 Enhance, nonlinear
## 9 Enhance, nonlinear
## 10 Enhance, bi-
## 11 Enhance, bi-
## 12 Enhance, bi-
## 13 Enhance, bi-
## 14 Enhance, bi-
## 15 Enhance, bi-
```

```
## F-test of ecological detector
ndvigdm$Ecological.detector$Ecological
```

| ##    | var1          | var2          | f         | sig          | eco |
|-------|---------------|---------------|-----------|--------------|-----|
| ## 1  | Climatezone   | Mining        | 0.2080971 | 1.000000e+00 | N   |
| ## 2  | Climatezone   | Tempchange    | 0.2637874 | 1.000000e+00 | N   |
| ## 3  | Climatezone   | Precipitation | 1.3616512 | 1.987113e-05 | Y   |
| ## 4  | Climatezone   | GDP           | 0.1968338 | 1.000000e+00 | N   |
| ## 5  | Climatezone   | Popdensity    | 0.2209808 | 1.000000e+00 | N   |
| ## 6  | Mining        | Tempchange    | 1.2676168 | 7.915003e-04 | Y   |
| ## 7  | Mining        | Precipitation | 6.5433453 | 0.000000e+00 | Y   |
| ## 8  | Mining        | GDP           | 0.9458750 | 7.709827e-01 | N   |
| ## 9  | Mining        | Popdensity    | 1.0619118 | 2.115358e-01 | N   |
| ## 10 | Tempchange    | Precipitation | 5.1619268 | 0.000000e+00 | Y   |
| ## 11 | Tempchange    | GDP           | 0.7461836 | 9.999515e-01 | N   |
| ## 12 | Tempchange    | Popdensity    | 0.8377230 | 9.908628e-01 | N   |
| ## 13 | Precipitation | GDP           | 0.1445553 | 1.000000e+00 | N   |
| ## 14 | Precipitation | Popdensity    | 0.1622888 | 1.000000e+00 | N   |
| ## 15 | GDP           | Popdensity    | 1.1226767 | 6.143133e-02 | N   |

Comparison of size effects of spatial units (Figure 9).

```
ndvilist <- list(ndvi_5, ndvi_10, ndvi_20, ndvi_30, ndvi_40, ndvi_50)
su <- c(5,10,20,30,40,50) ## sizes of spatial units
## set optional parameters of optimal discretization
discmethod <- c("equal","natural","quantile","geometric","sd")
discitv <- 3:7
## "gdm" function (~ 108 s)
gdlist <- list()
for (i in 1:6){
  gdlist[[i]] <- gdm(NDVchange ~ .,
    continuous_variable = c("Tempchange", "Precipitation", "GDP", "Popdensity"),
    data = ndvilist[[i]], discmethod = discmethod, discitv = discitv)
}
## size effects of spatial units
sesu(gdlist, su)
```

## 4.2 Spatial point or areal data of H1N1 flu incidences

### 4.2.1 In the whole study area

```
data(h1n1_100)
head(h1n1_100)
```

| ##   | H1N1      | temp   | prec     | humi    | popd   | gdpd   | rdds  | sensepop | urbanpop | medicost |
|------|-----------|--------|----------|---------|--------|--------|-------|----------|----------|----------|
| ## 1 | 2.02      | 22.257 | 2169.194 | 28.0085 | 171.24 | 0.4074 | 23.33 | 26.8913  | 52.74    | 94.1805  |
| ## 2 | 2.02      | 22.730 | 2131.414 | 44.7943 | 213.10 | 0.7876 | 26.55 | 26.8913  | 52.74    | 94.1805  |
| ## 3 | 2.02      | 23.288 | 2438.123 | 45.8407 | 288.81 | 1.5207 | 38.17 | 26.8913  | 52.74    | 94.1805  |
| ## 4 | 1.45      | 22.914 | 2251.993 | 24.3231 | 719.93 | 1.9710 | 53.61 | 23.9246  | 67.76    | 64.8081  |
| ## 5 | 1.45      | 22.566 | 2355.137 | 33.6370 | 791.68 | 3.4102 | 57.40 | 23.9246  | 67.76    | 64.8081  |
| ## 6 | 1.09      | 21.169 | 1658.817 | 34.9150 | 90.36  | 0.2519 | 17.24 | 28.0352  | 40.48    | 77.7068  |
| ##   | Georegion |        |          |         |        |        |       |          |          |          |
| ## 1 | S         |        |          |         |        |        |       |          |          |          |
| ## 2 | S         |        |          |         |        |        |       |          |          |          |
| ## 3 | S         |        |          |         |        |        |       |          |          |          |



```
## 4      S
## 5      S
## 6      W
```

Results of OPGD-based analysis for H1N1 flu incidences (Figure 10).

```
h1n1list <- list(h1n1_50, h1n1_100, h1n1_150)
su <- c(50, 100, 150)
## set optional parameters of optimal discretization
discmethod <- c("equal", "natural", "quantile", "geometric", "sd")
discitv <- 4:7
continuous_variable <- colnames(h1n1_50)[-c(1,11)]
## "gdm" function (~ 67 s)
gdlist <- list()
for (i in 1:3){
  gdlist[[i]] <- gdm(H1N1 ~ .,
    continuous_variable = continuous_variable,
    data = h1n1list[[i]],
    discmethod = discmethod, discitv = discitv)
}
## size effects of spatial units
sesu(gdlist, su)

## recalculation with 100-km spatial unit
discmethod <- c("equal", "natural", "quantile", "geometric", "sd")
discitv <- 4:7
continuous_variable <- colnames(h1n1_100)[-c(1,11)]
h1n1.gdm.100 <- gdm(H1N1 ~ .,
  continuous_variable = continuous_variable,
  data = h1n1_100,
  discmethod = discmethod, discitv = discitv)
h1n1.gdm.100
```

```
## Explanatory variables include 9 continuous variables.
##
## optimal discretization result of temp
## method          : equal
## number of intervals: 7
## intervals:
## -7.092 -2.740286 1.611429 5.963143 10.31486 14.66657 19.01829 23.37
## numbers of data within intervals:
## 78 175 178 167 148 172 69
##
## optimal discretization result of prec
## method          : natural
## number of intervals: 7
## intervals:
## 13.13 218.9193 407.3756 611.4574 828.5553 1176.74 1750.94 2569.669
## numbers of data within intervals:
## 171 153 196 204 108 120 35
##
## optimal discretization result of humi
## method          : quantile
## number of intervals: 6
## intervals:
```

```

## -109.0914 -54.95307 -29.4622 -8.1786 12.91037 41.38707 177.9288
## numbers of data within intervals:
## 165 164 165 164 164 165
##
## optimal discretization result of popd
## method : natural
## number of intervals: 6
## intervals:
## 0 15.4227 81.1539 225.1411 469.9451 989.8658 2786.56
## numbers of data within intervals:
## 471 140 184 100 71 21
##
## optimal discretization result of gdgd
## method : natural
## number of intervals: 7
## intervals:
## 0 0.059117 0.288647 0.666049 1.548748 3.410617 7.495601 22.1713
## numbers of data within intervals:
## 460 134 138 123 76 42 14
##
## optimal discretization result of rdds
## method : natural
## number of intervals: 7
## intervals:
## 0 3.9791 11.2851 21.8487 37.4985 62.3373 131.1288 316.5
## numbers of data within intervals:
## 396 150 145 153 73 55 15
##
## optimal discretization result of sensepop
## method : sd
## number of intervals: 6
## intervals:
## 18.5058 22.74193 24.14647 25.551 26.95554 28.36007 29.76461 31.3683
## numbers of data within intervals:
## 212 33 56 75 318 250 43
##
## optimal discretization result of urbanpop
## method : sd
## number of intervals: 4
## intervals:
## 23.71 35.0363 46.59943 58.16257 86.3
## numbers of data within intervals:
## 133 369 292 193
##
## optimal discretization result of medicost
## method : quantile
## number of intervals: 7
## intervals:
## 60.1877 64.8081 72.8208 79.1247 86.1034 95.1002 143.9295 158.2044
## numbers of data within intervals:
## 149 137 141 229 115 82 134
##
## Geographical detectors results:
##

```

```

## Factor detector:
##      variable      qv      sig
## 1      temp 0.49088033 1.838595e-10
## 2      prec 0.40566048 3.619388e-10
## 3      humi 0.17352575 2.380844e-10
## 4      popd 0.22000829 4.038251e-10
## 5      gdpd 0.21462378 7.726012e-10
## 6      rdds 0.23398371 7.034787e-10
## 7  sensepop 0.43308776 3.418482e-10
## 8  urbanpop 0.34291104 6.720092e-10
## 9  medicost 0.45571331 3.509079e-10
## 10 Georegion 0.07399135 6.481682e-11
##
## Risk detector:
## temp
##      itv  meanrisk
## 1 [-7.09,-2.74] 0.2285897
## 2  (-2.74,1.61] 0.2637714
## 3  (1.61,5.96] 0.3753933
## 4  (5.96,10.3] 0.6703593
## 5  (10.3,14.7] 0.6264189
## 6  (14.7,19] 0.8155233
## 7  (19,23.4] 1.5410145
##
## prec
##      itv  meanrisk
## 1      [13.1,219] 0.6188889
## 2      (219,407] 0.4271242
## 3      (407,611] 0.4032143
## 4      (611,829] 0.3638725
## 5      (829,1.18e+03] 0.6881481
## 6 (1.18e+03,1.75e+03] 1.0233333
## 7 (1.75e+03,2.57e+03] 1.7288571
##
## humi
##      itv  meanrisk
## 1  [-109,-55] 0.4675152
## 2  (-55,-29.5] 0.5257927
## 3 (-29.5,-8.18] 0.5613333
## 4  (-8.18,12.9] 0.3378659
## 5  (12.9,41.4] 0.6747561
## 6  (41.4,178] 0.9697576
##
## popd
##      itv  meanrisk
## 1      [0,15.4] 0.3786624
## 2      (15.4,81.2] 0.6187857
## 3      (81.2,225] 0.8997826
## 4      (225,470] 0.8733000
## 5      (470,990] 0.6371831
## 6 (990,2.79e+03] 0.9028571
##
## gdpd
##      itv  meanrisk

```

```

## 1      [0,0.0591] 0.3791739
## 2 (0.0591,0.289] 0.6033582
## 3 (0.289,0.666] 0.8801449
## 4 (0.666,1.55] 0.9006504
## 5 (1.55,3.41] 0.7182895
## 6 (3.41,7.5] 0.6107143
## 7 (7.5,22.2] 1.0228571
##
## rdds
##      itv  meanrisk
## 1      [0,3.98] 0.3558586
## 2 (3.98,11.3] 0.5077333
## 3 (11.3,21.8] 0.8104828
## 4 (21.8,37.5] 0.9307843
## 5 (37.5,62.3] 0.7598630
## 6 (62.3,131] 0.6310909
## 7 (131,316] 0.9920000
##
## sensepop
##      itv  meanrisk
## 1 [18.5,22.7] 0.5559434
## 2 (22.7,24.1] 1.3181818
## 3 (24.1,25.6] 0.8432143
## 4 (25.6,27] 0.7149333
## 5 (27,28.4] 0.5564465
## 6 (28.4,29.8] 0.2841600
## 7 (29.8,31.4] 1.6716279
##
## urbanpop
##      itv  meanrisk
## 1 [23.7,35] 0.0300000
## 2 (35,46.6] 0.7440108
## 3 (46.6,58.2] 0.4399315
## 4 (58.2,86.3] 0.9071503
##
## medicost
##      itv  meanrisk
## 1 [60.2,64.8] 0.48510067
## 2 (64.8,72.8] 0.64489051
## 3 (72.8,79.1] 1.14609929
## 4 (79.1,86.1] 0.60742358
## 5 (86.1,95.1] 0.82208696
## 6 (95.1,144] 0.25109756
## 7 (144,158] 0.04186567
##
## Georegion
##      itv  meanrisk
## 1      N 0.3687603
## 2      S 0.8471154
## 3      W 0.5708451
##
## temp
##      interval [-7.09,-2.74] (-2.74,1.61] (1.61,5.96] (5.96,10.3] (10.3,14.7]
## 1 [-7.09,-2.74]          <NA>          <NA>          <NA>          <NA>

```

```

## 2 (-2.74,1.61] N <NA> <NA> <NA> <NA>
## 3 (1.61,5.96] Y Y <NA> <NA> <NA>
## 4 (5.96,10.3] Y Y Y <NA> <NA>
## 5 (10.3,14.7] Y Y Y N <NA>
## 6 (14.7,19] Y Y Y Y Y
## 7 (19,23.4] Y Y Y Y Y
## (14.7,19] (19,23.4]
## 1 <NA> <NA>
## 2 <NA> <NA>
## 3 <NA> <NA>
## 4 <NA> <NA>
## 5 <NA> <NA>
## 6 <NA> <NA>
## 7 Y <NA>
##
## prec
## interval [13.1,219] (219,407] (407,611] (611,829] (829,1.18e+03]
## 1 [13.1,219] <NA> <NA> <NA> <NA> <NA>
## 2 (219,407] Y <NA> <NA> <NA> <NA>
## 3 (407,611] Y N <NA> <NA> <NA>
## 4 (611,829] Y N N <NA> <NA>
## 5 (829,1.18e+03] N Y Y Y <NA>
## 6 (1.18e+03,1.75e+03] Y Y Y Y Y
## 7 (1.75e+03,2.57e+03] Y Y Y Y Y
## (1.18e+03,1.75e+03] (1.75e+03,2.57e+03]
## 1 <NA> <NA>
## 2 <NA> <NA>
## 3 <NA> <NA>
## 4 <NA> <NA>
## 5 <NA> <NA>
## 6 <NA> <NA>
## 7 Y <NA>
##
## humi
## interval [-109,-55] (-55,-29.5] (-29.5,-8.18] (-8.18,12.9] (12.9,41.4]
## 1 [-109,-55] <NA> <NA> <NA> <NA> <NA>
## 2 (-55,-29.5] N <NA> <NA> <NA> <NA>
## 3 (-29.5,-8.18] Y N <NA> <NA> <NA>
## 4 (-8.18,12.9] Y Y Y <NA> <NA>
## 5 (12.9,41.4] Y Y Y Y <NA>
## 6 (41.4,178] Y Y Y Y Y
## (41.4,178]
## 1 <NA>
## 2 <NA>
## 3 <NA>
## 4 <NA>
## 5 <NA>
## 6 <NA>
##
## popd
## interval [0,15.4] (15.4,81.2] (81.2,225] (225,470] (470,990]
## 1 [0,15.4] <NA> <NA> <NA> <NA> <NA>
## 2 (15.4,81.2] Y <NA> <NA> <NA> <NA>
## 3 (81.2,225] Y Y <NA> <NA> <NA>

```

```

## 4      (225,470]      Y      Y      N      <NA>      <NA>
## 5      (470,990]      Y      N      Y      Y      <NA>
## 6 (990,2.79e+03]      Y      Y      N      N      Y
## (990,2.79e+03]
## 1      <NA>
## 2      <NA>
## 3      <NA>
## 4      <NA>
## 5      <NA>
## 6      <NA>
##
## gdpd
##      interval [0,0.0591] (0.0591,0.289] (0.289,0.666] (0.666,1.55]
## 1      [0,0.0591]      <NA>      <NA>      <NA>      <NA>
## 2 (0.0591,0.289]      Y      <NA>      <NA>      <NA>
## 3 (0.289,0.666]      Y      Y      <NA>      <NA>
## 4 (0.666,1.55]      Y      Y      N      <NA>
## 5 (1.55,3.41]      Y      N      Y      Y
## 6 (3.41,7.5]      Y      N      Y      Y
## 7 (7.5,22.2]      Y      Y      N      N
## (1.55,3.41] (3.41,7.5] (7.5,22.2]
## 1      <NA>      <NA>      <NA>
## 2      <NA>      <NA>      <NA>
## 3      <NA>      <NA>      <NA>
## 4      <NA>      <NA>      <NA>
## 5      <NA>      <NA>      <NA>
## 6      N      <NA>      <NA>
## 7      Y      Y      <NA>
##
## rdds
##      interval [0,3.98] (3.98,11.3] (11.3,21.8] (21.8,37.5] (37.5,62.3]
## 1      [0,3.98]      <NA>      <NA>      <NA>      <NA>      <NA>
## 2 (3.98,11.3]      Y      <NA>      <NA>      <NA>      <NA>
## 3 (11.3,21.8]      Y      Y      <NA>      <NA>      <NA>
## 4 (21.8,37.5]      Y      Y      N      <NA>      <NA>
## 5 (37.5,62.3]      Y      Y      N      Y      <NA>
## 6 (62.3,131]      Y      Y      Y      Y      N
## 7 (131,316]      Y      Y      N      N      N
## (62.3,131] (131,316]
## 1      <NA>      <NA>
## 2      <NA>      <NA>
## 3      <NA>      <NA>
## 4      <NA>      <NA>
## 5      <NA>      <NA>
## 6      <NA>      <NA>
## 7      Y      <NA>
##
## sensepop
##      interval [18.5,22.7] (22.7,24.1] (24.1,25.6] (25.6,27] (27,28.4]
## 1 [18.5,22.7]      <NA>      <NA>      <NA>      <NA>      <NA>
## 2 (22.7,24.1]      Y      <NA>      <NA>      <NA>      <NA>
## 3 (24.1,25.6]      Y      Y      <NA>      <NA>      <NA>
## 4 (25.6,27]      Y      Y      N      <NA>      <NA>
## 5 (27,28.4]      N      Y      Y      Y      <NA>

```

```

## 6 (28.4,29.8]          Y          Y          Y          Y          Y
## 7 (29.8,31.4]          Y          Y          Y          Y          Y
## (28.4,29.8] (29.8,31.4]
## 1      <NA>      <NA>
## 2      <NA>      <NA>
## 3      <NA>      <NA>
## 4      <NA>      <NA>
## 5      <NA>      <NA>
## 6      <NA>      <NA>
## 7          Y      <NA>
##
## urbanpop
## interval [23.7,35] (35,46.6] (46.6,58.2] (58.2,86.3]
## 1 [23.7,35]      <NA>      <NA>      <NA>      <NA>
## 2 (35,46.6]      Y      <NA>      <NA>      <NA>
## 3 (46.6,58.2]      Y      Y      <NA>      <NA>
## 4 (58.2,86.3]      Y      Y      Y      <NA>
##
## medicost
## interval [60.2,64.8] (64.8,72.8] (72.8,79.1] (79.1,86.1] (86.1,95.1]
## 1 [60.2,64.8]      <NA>      <NA>      <NA>      <NA>      <NA>
## 2 (64.8,72.8]      Y      <NA>      <NA>      <NA>      <NA>
## 3 (72.8,79.1]      Y      Y      <NA>      <NA>      <NA>
## 4 (79.1,86.1]      Y      N      Y      <NA>      <NA>
## 5 (86.1,95.1]      Y      Y      Y      Y      <NA>
## 6 (95.1,144]      Y      Y      Y      Y      Y
## 7 (144,158]      Y      Y      Y      Y      Y
## (95.1,144] (144,158]
## 1      <NA>      <NA>
## 2      <NA>      <NA>
## 3      <NA>      <NA>
## 4      <NA>      <NA>
## 5      <NA>      <NA>
## 6      <NA>      <NA>
## 7          Y      <NA>
##
## Georegion
## interval      N      S      W
## 1      N <NA> <NA> <NA>
## 2      S      Y <NA> <NA>
## 3      W      Y      Y <NA>
##
## Interaction detector:
## variable      temp      prec      humi      popd      gdpd      rdds      sensepop      urbanpop
## 1      temp      NA      NA      NA      NA      NA      NA      NA      NA
## 2      prec      0.5837      NA      NA      NA      NA      NA      NA      NA
## 3      humi      0.5754      0.4510      NA      NA      NA      NA      NA      NA
## 4      popd      0.5483      0.4984      0.3903      NA      NA      NA      NA      NA
## 5      gdpd      0.5483      0.5043      0.3906      0.2309      NA      NA      NA      NA
## 6      rdds      0.5482      0.5343      0.4138      0.2427      0.2444      NA      NA      NA
## 7      sensepop      0.7005      0.7133      0.6048      0.5992      0.6137      0.6125      NA      NA
## 8      urbanpop      0.6902      0.6333      0.4970      0.5177      0.5204      0.5369      0.7739      NA
## 9      medicost      0.7732      0.7568      0.6910      0.5951      0.6038      0.6254      0.7940      0.6127
## 10 Georegion      0.5266      0.4431      0.2183      0.3298      0.3261      0.3459      0.5874      0.4472

```

```
##      medicost Georegion
## 1      NA      NA
## 2      NA      NA
## 3      NA      NA
## 4      NA      NA
## 5      NA      NA
## 6      NA      NA
## 7      NA      NA
## 8      NA      NA
## 9      NA      NA
## 10 0.6297      NA
##
## Ecological detector:
##      variable temp prec humi popd gdpd rdds sensepop urbanpop medicost Georegion
## 1      temp <NA> <NA> <NA> <NA> <NA> <NA> <NA> <NA> <NA> <NA>
## 2      prec  N <NA> <NA> <NA> <NA> <NA> <NA> <NA> <NA> <NA>
## 3      humi  N  N <NA> <NA> <NA> <NA> <NA> <NA> <NA> <NA>
## 4      popd  N  N  N <NA> <NA> <NA> <NA> <NA> <NA> <NA>
## 5      gdpd  N  N  N  N <NA> <NA> <NA> <NA> <NA> <NA>
## 6      rdds  N  N  N  N  N <NA> <NA> <NA> <NA> <NA>
## 7  sensepop  N  N  Y  Y  Y  Y <NA> <NA> <NA> <NA>
## 8  urbanpop  N  N  Y  Y  Y  Y  N <NA> <NA> <NA>
## 9  medicost  N  N  Y  Y  Y  Y  N  Y <NA> <NA>
## 10 Georegion  N  N  N  N  N  N  N  N  N  N <NA>
```

```
plot(h1n1.gdm.100)
```

Spatial analysis for data in three sub-regions (Figure 11).

```
## data in different regions
h1n1list <- list(h1n1_50, h1n1_100, h1n1_150)
h1n1.N <- lapply(h1n1list, function(x) x[which(x$Georegion == "N"), 1:10])
h1n1.S <- lapply(h1n1list, function(x) x[which(x$Georegion == "S"), 1:10])
h1n1.W <- lapply(h1n1list, function(x) x[which(x$Georegion == "W"), 1:10])
## select spatial unit
su <- c(50, 100, 150)
## set optional parameters of optimal discretization
discmethod <- c("equal", "natural", "quantile", "geometric", "sd")
discitv <- c(3:4)
continuous_variable <- colnames(h1n1_50)[-c(1,11)]
## "gdm" for region "N"
gdlist <- list()
for (i in 1:3){
  gdlist[[i]] <- gdm(H1N1 ~ .,
    continuous_variable = continuous_variable,
    data = h1n1.N[[i]],
    discmethod = discmethod, discitv = discitv)
}
sesu(gdlist, su) # => 150 km
## "gdm" for region "S"
gdlist <- list()
for (i in 1:3){
  gdlist[[i]] <- gdm(H1N1 ~ .,
    continuous_variable = continuous_variable,
    data = h1n1.S[[i]],
```



```

        discmethod = discmethod, discitv = discitv)
}
sesu(gdlist, su) # => 150 km
## "gdm" for region "W"
gdlist <- list()
for (i in 1:3){
  gdlist[[i]] <- gdm(H1N1 ~ .,
    continuous_variable = continuous_variable,
    data = h1n1.W[[i]],
    discmethod = discmethod, discitv = discitv)
}
sesu(gdlist, su) # => 150 km
## recalculation for datasets in different regions
## region "N"
h1n1.N.150 <- gdm(H1N1 ~ .,
  continuous_variable = continuous_variable,
  data = h1n1.N[[3]],
  discmethod = discmethod, discitv = discitv)
h1n1.N.150
plot(h1n1.N.150)
## region "S"
h1n1.S.150 <- gdm(H1N1 ~ .,
  continuous_variable = continuous_variable,
  data = h1n1.S[[3]],
  discmethod = discmethod, discitv = discitv)
h1n1.S.150
plot(h1n1.S.150)
## region "W"
h1n1.W.150 <- gdm(H1N1 ~ .,
  continuous_variable = continuous_variable,
  data = h1n1.W[[3]],
  discmethod = discmethod, discitv = discitv)
h1n1.W.150
plot(h1n1.W.150)

```

### 4.3 Spatial line segment data of road damage

```

data(road_GD)
head(road_GD)

##      damage speed soiltype population vehicles
## 1 325.772   110  Tenosol     227.42      420
## 2 325.772   110  Hydrosol     227.42      420
## 3 325.772   110  Hydrosol     227.42      420
## 4 325.772   110  Hydrosol     227.42      420
## 5 325.772   110  Hydrosol     227.42      420
## 6 325.772   110  Hydrosol     227.42      420

```

Results of OPGD-based analysis for the road damage conditions (Figure 12).

```

## set optional discretization methods and numbers of intervals
discmethod <- c("equal", "natural", "quantile", "geometric", "sd")
discitv <- c(3:7)

```

```

continuous_variable <- colnames(road_GD)[c(4,5)]
## geographical detectors with optimal parameters
gdm_road <- gdm(damage ~ .,
               continuous_variable = continuous_variable,
               data = road_GD,
               discmethod = discmethod, discity = discity)
gdm_road

```

```
## Explanatory variables include 2 continuous variables.
```

```
##
```

```
## optimal discretization result of population
```

```
## method          : quantile
```

```
## number of intervals: 5
```

```
## intervals:
```

```
## 1.04 10.4 53.13 215.19 357.15 2489.72
```

```
## numbers of data within intervals:
```

```
## 1001 1008 1038 982 971
```

```
##
```

```
## optimal discretization result of vehicles
```

```
## method          : equal
```

```
## number of intervals: 7
```

```
## intervals:
```

```
## 100 815 1530 2245 2960 3675 4390 5105
```

```
## numbers of data within intervals:
```

```
## 2986 1020 468 115 224 117 70
```

```
##
```

```
## Geographical detectors results:
```

```
##
```

```
## Factor detector:
```

```
##      variable      qv      sig
```

```
## 1      speed 0.0108854 2.334147e-05
```

```
## 2    soiltype 0.1977133 3.204566e-10
```

```
## 3 population 0.0846682 6.368206e-11
```

```
## 4   vehicles 0.1202810 3.536698e-10
```

```
##
```

```
## Risk detector:
```

```
## speed
```

```
##      itv meanrisk
```

```
## 1 40-50 356.1679
```

```
## 2 60-70 374.0222
```

```
## 3   80 342.7952
```

```
## 4   90 336.2123
```

```
## 5  100 300.0822
```

```
## 6  110 387.7802
```

```
##
```

```
## soiltype
```

```
##      itv meanrisk
```

```
## 1 Calcarosol 473.1282
```

```
## 2 Chromosol 370.2571
```

```
## 3 Hydrosol 366.9375
```

```
## 4 Kandosol 340.3882
```

```
## 5 Podosol 869.3997
```

```
## 6 Sodosol 347.1542
```

```
## 7 Tenosol 530.9144
```

```

##
## population
##          itv meanrisk
## 1    [1.04,10.4] 354.3701
## 2    (10.4,53.1] 484.5460
## 3    (53.1,215] 353.8543
## 4    (215,357] 358.7460
## 5 (357,2.49e+03] 342.4888
##
## vehicles
##          itv meanrisk
## 1    [100,815] 354.0679
## 2    (815,1.53e+03] 412.7972
## 3 (1.53e+03,2.24e+03] 438.7350
## 4 (2.24e+03,2.96e+03] 300.5194
## 5 (2.96e+03,3.68e+03] 296.8623
## 6 (3.68e+03,4.39e+03] 715.4692
## 7 (4.39e+03,5.10e+03] 384.2573
##
## speed
## interval 40-50 60-70 80 90 100 110
## 1 40-50 <NA> <NA> <NA> <NA> <NA> <NA>
## 2 60-70 N <NA> <NA> <NA> <NA> <NA>
## 3 80 N Y <NA> <NA> <NA> <NA>
## 4 90 N Y N <NA> <NA> <NA>
## 5 100 Y Y Y Y <NA> <NA>
## 6 110 Y N Y Y Y <NA>
##
## soiltype
## interval Calcarosol Chromosol Hydrosol Kandosol Podosol Sodosol Tenosol
## 1 Calcarosol <NA> <NA> <NA> <NA> <NA> <NA> <NA>
## 2 Chromosol Y <NA> <NA> <NA> <NA> <NA> <NA>
## 3 Hydrosol Y N <NA> <NA> <NA> <NA> <NA>
## 4 Kandosol Y Y Y <NA> <NA> <NA> <NA>
## 5 Podosol Y Y Y Y <NA> <NA> <NA>
## 6 Sodosol Y Y Y Y Y <NA> <NA>
## 7 Tenosol Y Y Y Y Y Y <NA>
##
## population
## interval [1.04,10.4] (10.4,53.1] (53.1,215] (215,357] (357,2.49e+03]
## 1 [1.04,10.4] <NA> <NA> <NA> <NA> <NA>
## 2 (10.4,53.1] Y <NA> <NA> <NA> <NA>
## 3 (53.1,215] N Y <NA> <NA> <NA>
## 4 (215,357] N Y N <NA> <NA>
## 5 (357,2.49e+03] Y Y Y Y <NA>
##
## vehicles
## interval [100,815] (815,1.53e+03] (1.53e+03,2.24e+03]
## 1 [100,815] <NA> <NA> <NA>
## 2 (815,1.53e+03] Y <NA> <NA>
## 3 (1.53e+03,2.24e+03] Y Y <NA>
## 4 (2.24e+03,2.96e+03] Y Y Y
## 5 (2.96e+03,3.68e+03] Y Y Y
## 6 (3.68e+03,4.39e+03] Y Y Y

```

```

## 7 (4.39e+03,5.10e+03]          Y          N          Y
## (2.24e+03,2.96e+03] (2.96e+03,3.68e+03] (3.68e+03,4.39e+03]
## 1          <NA>          <NA>          <NA>
## 2          <NA>          <NA>          <NA>
## 3          <NA>          <NA>          <NA>
## 4          <NA>          <NA>          <NA>
## 5          N          <NA>          <NA>
## 6          Y          Y          <NA>
## 7          Y          Y          Y
## (4.39e+03,5.10e+03]
## 1          <NA>
## 2          <NA>
## 3          <NA>
## 4          <NA>
## 5          <NA>
## 6          <NA>
## 7          <NA>
##
## Interaction detector:
##   variable speed soiltype population vehicles
## 1   speed    NA      NA      NA      NA
## 2  soiltype 0.2428    NA      NA      NA
## 3 population 0.1173  0.3158    NA      NA
## 4  vehicles 0.1438  0.4712  0.4237    NA
##
## Ecological detector:
##   variable speed soiltype population vehicles
## 1   speed <NA>    <NA>    <NA>    <NA>
## 2  soiltype  Y    <NA>    <NA>    <NA>
## 3 population  Y      N    <NA>    <NA>
## 4  vehicles  Y      N      N    <NA>
plot(gdm_road)

```
